# Supplementary material for: Combination of crystal-field dependent and independent paramagnetic NMR hyperfine shift analysis methods for investigating the solution structures of inert self-assembled heterodimetallic d–f supramolecular complexes †
Source: Royal Society of Chemistry journal article supplement (doi:10.1039/b007219m), 2000-01-01
Supplement: b007219m.doc [file b007219m.doc]

**Combination of crystal-field dependent and independent paramagnetic NMR hyperfine shift analysis methods for investigating the solution structures of inert self-assembled heterodimetallic d-f supramolecular complexes.**

________________________________________________________________________________

Stéphane Rigault, Claude Piguet,* Gérald Bernardinelli and Gérard Hopfgartner

**Supplementary data available**

*Table S1 Molecular peaks of complexes of L and adduct ions observed by ESI-MS.*

| Metal | Cation | m/z*a* | Metal | Cation | m/z*a* |
| --- | --- | --- | --- | --- | --- |
| CoII | [CoL3]2+ | 844.8 | EuIII/CoII | [EuCoL3]5+ | 368.3 |
|  | [CoL2]2+ | 573.0 |  | [EuCoL3(ClO4)]4+ | 485.4 |
|  | [Co2L3]4+ | 437.0 |  | [EuCoL3(ClO4)2]3+ | 680.0 |
|  | [Co2L2]4+ | 301.2 |  | [EuCoL3(ClO4)3]2+ | 1069.3 |
|  | [Co2L2(ClO4)]3+ | 434.7 |  | [CoL2]2+ | 572.7 |
|  | [Co2L2(ClO4)2]2+ | 702.4 | LuIII/CoII | [LuCoL3]5+ | 372.9 |
| LaIII/CoII | [LaCoL3]5+ | 365.5 |  | [LuCoL3(ClO4)]4+ | 490.8 |
|  | [LaCoL3(ClO4)]4+ | 481.8 |  | [LuCoL3(ClO4)2]3+ | 687.7 |
|  | [LaCoL3(ClO4)2]3+ | 676.1 |  | [LuCoL3(ClO4)3]2+ | 1081.0 |
|  | [LaCoL3(ClO4)3]2+ | 1063.3 |  | [CoL2]2+ | 572.7 |
|  | [CoL2]2+ | 572.7 |  |  |  |

*a* m/z values given for the maximum of the peak.

Table S2. Selected Least-Squares Plane Data for [LuCoL3](CF3SO3)6(CH3CN)2(H2O) (7).

**deviations, Å**

__________________

**Least-squares planes descriptiona) max atom**

____________________________________________________________________________

**PaCo pyridine, N(1a) 0.01 C(1a)
BaCo benzimidazole, N(2a), N(3a) 0.04 C(7a)
BaLu benzimidazole, N(4a), N(5a) 0.05 C(18a)
PaLu pyridine, N(6a) 0.04 C(23a)
CaLu carboxamide C(25a), C(26a), O(1a), N(7a) 0.007 C(26a)
PbCo pyridine, N(1b) 0.03 C(2b)
BbCo benzimidazole, N(2b), N(3b) 0.04 C(6b)
BbLu benzimidazole, N(4b), N(5b) 0.02 C(19b)
PbLu pyridine, N(6b) 0.03 C(24b)
CbLu carboxamide C(25b), C(26b), O(1b), N(7b) 0.002 C(26b)
PcCo pyridine, N(1c) 0.03 C(5c)
BcCo benzimidazole, N(2c), N(3c) 0.02 C(8c)
BcLu benzimidazole, N(4c), N(5c) 0.03 C(15c)
PcLu pyridine, N(6c) 0.02 C(23c)
CcLu carboxamide C(25c), C(26c), O(1c), N(7c) 0.002 C(26c)**

Interplane Angles (°)

|  | BaCo | BaLu | PaLu | CaLu | PbCo | BbCo | BbLu | PbLu | CbLu | PcCo | BcCo | BcLu | PcLu | CcLu |
| --- | --- | --- | --- | --- | --- | --- | --- | --- | --- | --- | --- | --- | --- | --- |
| PaCo | 9 | 85 | 80 | 51 | 84 | 81 | 42 | 48 | 68 | 79 | 84 | 50 | 68 | 43 |
| BaCo |  | 87 | 88 | 59 | 88 | 76 | 36 | 43 | 60 | 71 | 76 | 48 | 64 | 35 |
| BaLu |  |  | 24 | 37 | 49 | 45 | 69 | 68 | 37 | 41 | 34 | 72 | 57 | 52 |
| PaLu |  |  |  | 31 | 25 | 27 | 87 | 88 | 58 | 65 | 58 | 61 | 41 | 58 |
| CaLu |  |  |  |  | 45 | 55 | 75 | 77 | 72 | 70 | 63 | 90 | 70 | 86 |
| PbCo |  |  |  |  |  | 16 | 79 | 76 | 78 | 89 | 82 | 47 | 28 | 65 |
| BbCo |  |  |  |  |  |  | 86 | 90 | 67 | 80 | 65 | 35 | 15 | 49 |
| BbLu |  |  |  |  |  |  |  | 7 | 33 | 39 | 45 | 64 | 82 | 38 |
| PbLu |  |  |  |  |  |  |  |  | 32 | 34 | 41 | 80 | 87 | 43 |
| CbLu |  |  |  |  |  |  |  |  |  | 16 | 17 | 74 | 71 | 36 |
| PcCo |  |  |  |  |  |  |  |  |  |  | 8 | 90 | 86 | 52 |
| BcCo |  |  |  |  |  |  |  |  |  |  |  | 89 | 82 | 53 |
| BcLu |  |  |  |  |  |  |  |  |  |  |  |  | 20 | 39 |
| PcLu |  |  |  |  |  |  |  |  |  |  |  |  |  | 44 |

a The rings are denoted as P = pyridine, B = benzimidazole and C = carboxamide, belonging to ligand strand a, b, or c and bound to Lu or Co. Thus, BbLu is the benzimidazole ring of strand b that is bound to Lu. The error in the dihedral angles between aromatic planes is typically 1°.

|  | F2 | F3 | F4 | F5 |
| --- | --- | --- | --- | --- |
| F1 | 1 | 14 | 17 | 18 |
| F2 |  | 13 | 16 | 17 |
| F3 |  |  | 3 | 4 |
| F4 |  |  |  | 1 |

***a* F1: N1a, N1b, N1c; F2: N2a, N2b, N2c; F3: N4a, N4b, N4c; F4: N6a, N6b, N6c; F5: O1a, O1b, O1c**

Table S3. Selected Least-Squares Plane Data for [LaCoL3](ClO4)5.5(OH)0.5(CH3CN)4(H2O)2 (6).

**deviations, Å**

__________________

**Least-squares planes descriptiona) max atom**

____________________________________________________________________________

**PaCo pyridine, N(1a) 0.02 C(3a)
BaCo benzimidazole, N(2a), N(3a) 0.05 C(7a)
BaLa benzimidazole, N(4a), N(5a) 0.05 C(14a)
PaLa pyridine, N(6a) 0.03 C(25a)
CaLa carboxamide C(25a), C(26a), O(1a), N(7a) 0.02 C(26a)
PbCo pyridine, N(1b) 0.02 C(2b)
BbCo benzimidazole, N(2b), N(3b) 0.08 C(6b)
BbLa benzimidazole, N(4b), N(5b) 0.05 C(20b)
PbLa pyridine, N(6b) 0.03 C(21b)
CbLa carboxamide C(25b), C(26b), O(1b), N(7b) 0.01 C(26b)
PcCo pyridine, N(1c) 0.07 C(2c)
BcCo benzimidazole, N(2c), N(3c) 0.05 C(8c)
BcLa benzimidazole, N(4c), N(5c) 0.05 C(20c)
PcLa pyridine, N(6c) 0.04 C(23c)
CcLa carboxamide C(25c), C(26c), O(1c), N(7c) 0.05 C(26c)**

Interplane Angles (°)

|  | BaCo | BaLa | PaLa | CaLa | PbCo | BbCo | BbLa | PbLa | CbLa | PcCo | BcCo | BcLa | PcLa | CcLa |
| --- | --- | --- | --- | --- | --- | --- | --- | --- | --- | --- | --- | --- | --- | --- |
| PaCo | 17 | 86 | 82 | 60 | 79 | 87 | 35 | 54 | 36 | 83 | 65 | 51 | 35 | 65 |
| BaCo |  | 85 | 85 | 54 | 62 | 72 | 43 | 60 | 27 | 82 | 67 | 35 | 20 | 51 |
| BaLa |  |  | 16 | 35 | 51 | 33 | 73 | 61 | 59 | 32 | 45 | 76 | 85 | 39 |
| PaLa |  |  |  | 44 | 38 | 19 | 84 | 75 | 62 | 48 | 60 | 67 | 80 | 34 |
| CaLa |  |  |  |  | 55 | 45 | 40 | 36 | 27 | 31 | 26 | 60 | 61 | 29 |
| PbCo |  |  |  |  |  | 19 | 87 | 90 | 53 | 78 | 81 | 33 | 48 | 26 |
| BbCo |  |  |  |  |  |  | 83 | 80 | 54 | 61 | 68 | 49 | 62 | 22 |
| BbLa |  |  |  |  |  |  |  | 19 | 34 | 51 | 32 | 73 | 62 | 63 |
| PbLa |  |  |  |  |  |  |  |  | 43 | 34 | 16 | 95 | 71 | 64 |
| CbLa |  |  |  |  |  |  |  |  |  | 54 | 44 | 41 | 37 | 32 |
| PcCo |  |  |  |  |  |  |  |  |  |  | 19 | 89 | 88 | 56 |
| BcCo |  |  |  |  |  |  |  |  |  |  |  | 84 | 81 | 55 |
| BcLa |  |  |  |  |  |  |  |  |  |  |  |  | 16 | 38 |
| PcLa |  |  |  |  |  |  |  |  |  |  |  |  |  | 47 |

a The rings are denoted as P = pyridine, B = benzimidazole and C = carboxamide, belonging to ligand strand a, b, or c and bound to La or Co. Thus, BbLa is the benzimidazole ring of strand b that is bound to La. The error in the dihedral angles between aromatic planes is typically 1°.

|  | F2 | F3 | F4 | F5 |
| --- | --- | --- | --- | --- |
| F1 | 2 | 1 | 3 | 4 |
| F2 |  | 2 | 3 | 3 |
| F3 |  |  | 2 | 2 |
| F4 |  |  |  | 1 |

***a* F1: N1a, N1b, N1c; F2: N2a, N2b, N2c; F3: N4a, N4b, N4c; F4: N6a, N6b, N6c; F5: O1a, O1b, O1c**

Table S4 Selected structural data*a* for the lutetium coordination sphere in [LuCoL3](CF3SO3)6(CH3CN)2(H2O) (7). Values for [LaCoL3]5+in 6 are given between parentheses.22

____________________________________________________________________

Angles **** [°]*a*

R**1**-Ln-R**2** 179 (178)

Angles **i** [°] (distal tripods)*a*

R**2**-Ln-N(4a) 52 (54) R**1**-Ln-O(1a) 46 (50)

R**2**-Ln-N(4b) 54 (54) R**1**-Ln-O(1b) 47 (49)

R**2**-Ln-N(4c) 49 (55) R**1**-Ln-O(1c) 48 (48)

Angles **i** [°] (intraligand)***a***

Proj[N(4a)]-Ln-Proj[N(6a)]***b*** 52 (53) Proj[N(6b)]-Ln-Proj[O(1b)] 58 (56)

Proj[N(6a)]-Ln-Proj[O(1a)] 56 (52) Proj[N(4c)]-Ln-Proj[N(6c)] 51 (48)

Proj[N(4b)]-Ln-Proj[N(6b)] 53 (50) Proj[N(6c)]-Ln-Proj[O(1c)] 61 (54)

Angles **i** [°] (interligand)***a***

Proj[N(4a)]-Ln-Proj[O(1b)] 10 (16) Proj[N(4b)]-Ln-Proj[N(6c)] 71(68)

Proj[N(4b)]-Ln-Proj[O(1c)] 10 (16) Proj[N(4c)]-Ln-Proj[N(6a)] 64 (70)

Proj[N(4c)]-Ln-Proj[O(1a)] 8 (15) Proj[N(4a)]-Ln-Proj[N(6b)] 68 (70)

Proj[N(4c)]-Ln-Proj[N(6b)] 175 (172) Proj[N(6a)]-Ln-Proj[N(6b)] 115 (118)

Proj[N(4a)]-Ln-Proj[N(6c)] 167 (171) Proj[N(6b)]-Ln-Proj[N(6c)] 124 (119)

Proj[N(4b)]-Ln-Proj[N(6a)] 174 (168) Proj[N(6a)]-Ln-Proj[N(6c)] 115 (123)

____________________________________________________________________

*a* For the definition of , i and i, see the associated scheme and references 50. The error in the angles is typically 1°. *b* Proj[N(i)] is the projection of N(i) along the R1-R2 direction onto a perpendicular plane passing through the lanthanide atom. R2 = Ln-N4a + Ln-N4b + Ln-N4c and R1 = Ln-O1a + Ln-O1b + Ln-O1c.

Table S5 Selected structural data***a*** for the cobalt coordination sphere in **[LuCoL3](CF3SO3)6 (CH3CN)2(H2O) (**7**).** *b* **Values for [LaCoL3]5+ in** 6 **are given between parentheses.22**

____________________________________________________________________

Angles **** [°]***a***

R**1**-Co-R**2** 178 (179)

Angles **i** [°] (distal tripods)*a*

R**1**-Co-N(1a) 59 (60) R**2**-Co-N(2a) 59 (60)

R**1**-Co-N(1b) 58 (58) R**2**-Co-N(2b) 60 (59)

R**1**-Co-N(1c) 58 (59) R**2**-Co-N(2c) 57 (60)

Angles **i** [°] (intraligand)*a*

Proj[N(1a)]-Co-Proj[N(2a)]*b* 57 (55)

Proj[N(1b)]-Co-Proj[N(2b)] 56 (55)

Proj[N(1c)]-Co-Proj[N(2c)] 56 (57)

Angles **i** [°] (interligand)**a)**

Proj[N(1a)]-Co-Proj[N(1b)] 121 (120) Proj[N(1a)]-Co-Proj[N(2b)] 65 (65)

Proj[N(1a)]-Co-Proj[N(1c)] 120 (121) Proj[N(1b)]-Co-Proj[N(2c)] 63 (64)

Proj[N(1b)]-Co-Proj[N(1c)] 119 (119) Proj[N(1c)]-Co-Proj[N(2a)] 63 (64)

Proj[N(2a)]-Co-Proj[N(2b)] 123 (120) Proj[N(1a)]-Co-Proj[N(2c)] 176 (176)

Proj[N(2a)]-Co-Proj[N(2c)] 118 (119) Proj[N(1b)]-Co-Proj[N(2a)] 179 (175)

Proj[N(2b)]-Co-Proj[N(2c)] 119 (121) Proj[N(1c)]-Co-Proj[N(2b)] 175 (176)

____________________________________________________________________

*a* For the definition of , i and i, see the associated scheme and references 44. The error in the angles is typically 1°. *b* Proj[N(i)] is the projection of N(i) along the R1-R2 direction onto a perpendicular plane passing through the cobalt atom. R1 = Co-N1a + Co-N1b + Co-N1c and R2 = Co-N2a + Co-N2b + Co-N2c.

Table S6 1H NMR shifts (with respect to SiMe4) of [LnCoL3]6+ in CD3CN at 298 K.19

bidentate binding unit

| Compd | **Me1** | **Me2** | **H1** | **H2** | **H3** | **H4** | **H5** | **H6** |
| --- | --- | --- | --- | --- | --- | --- | --- | --- |
| [LaCo(L4)3]6+ | **2.25** | **4.44** | **6.97** | **8.15** | **8.48** | **7.71** | **7.23** | **4.44** |
| [YCo(L4)3]6+ | **2.25** | **4.45** | **6.97** | **8.15** | **8.48** | **7.76** | **7.29** | **4.37** |
| [LuCo(L4)3]6+ | **2.24** | **4.45** | **6.97** | **8.15** | **8.48** | **7.76** | **7.29** | **4.34** |
| [CeCo(L4)3]6+ | **1.99** | **4.02** | **6.49** | **7.89** | **8.08** | **7.26** | **6.84** | **2.42** |
| [PrCo(L4)3]6+ | **1.87** | **3.78** | **6.19** | **7.72** | **7.83** | **6.94** | **6.54** | **1.20** |
| [NdCo(L4)3]6+ | **2.06** | **4.13** | **6.6** | **7.96** | **8.18** | **7.37** | **6.92** | **2.99** |
| [SmCo(L4)3]6+ | **2.20** | **4.37** | **6.86** | **7.95** | **8.11** | **7.65** | **7.19** | **4.46** |
| [EuCo(L4)3]6+ | **2.46** | **4.78** | **7.32** | **8.39** | **8.81** | **8.15** | **7.64** | **6.04** |
| [TbCo(L4)3]6+ | **-0.46** | **-0.19** | **1.95** | **5.17** | **4.04** | **2.34** | **2.94** | **-17.62** |
| [DyCo(L4)3]6+ | **-0.53** | **-0.65** | **0.04** | **4.94** | **3.70** | **1.80** | **1.70** | **-19.20** |
| [TmCo(L4)3]6+ | **3.21** | **6.15** | **8.76** | **9.23** | **10.07** | **9.92** | **9.35** | **12.14** |
| [YbCo(L4)3]6+ | **2.65** | **5.13** | **7.67** | **8.59** | **9.11** | **8.62** | **8.13** | **7.50** |

**Table S6 (continued)**

tridentate binding unit

| Compd | H9 | H10 | H11 | H12 | H13 | H14 | Me3 | Me4 | Me5 |
| --- | --- | --- | --- | --- | --- | --- | --- | --- | --- |
| [LaCo(L4)3]6+ | **5.78** | **7.15** | **7.69** | **8.55** | **8.31** | **7.80** | **4.41** | **0.91** | **0.73** |
| [YCo(L4)3]6+ | **5.42** | **7.10** | **7.66** | **8.63** | **8.29** | **7.83** | **4.45** | **1.01** | **0.68** |
| [LuCo(L4)3]6+ | **5.31** | **7.09** | **7.66** | **8.64** | **8.28** | **7.83** | **4.44** | **1.03** | **0.66** |
| [CeCo(L4)3]6+ | **-0.50** | **6.67** | **7.88** | **10.96** | **9.97** | **8.92** | **5.35** | **-1.17** | **1.22** |
| [PrCo(L4)3]6+ | **-4.50** | **6.41** | **8.26** | **12.80** | **10.95** | **9.83** | **6.05** | **-2.67** | **1.72** |
| [NdCo(L4)3]6+ | **1.48** | **6.79** | **8.38** | **11.15** | **9.77** | **9.29** | **5.07** | **-0.77** | **1.36** |
| [SmCo(L4)3]6+ | **4.05** | **7.04** | **7.63** | **8.89** | **8.50** | **8.41** | **4.62** | **0.34** | **1.03** |
| [EuCo(L4)3]6+ | **9.92** | **7.50** | **6.34** | **4.77** | **6.42** | **5.50** | **3.84** | **2.46** | **0.42** |
| [TbCo(L4)3]6+ | **-68.0** | **1.95** | **4.95** | **28.25** | **21.05** | **16.00** | **17.07** | **-24.1** | **4.70** |
| [DyCo(L4)3]6+ | **-76.0** | **1.55** | **6.10** | **31.20** | **22.70** | **18.00** | **18.80** | **-28.7** | **7.11** |
| [TmCo(L4)3]6+ | **30.0** | **8.40** | **6.53** | **-0.95** | **1.24** | **2.77** | **0.80** | **9.17** | **-1.10** |
| [YbCo(L4)3]6+ | **15.40** | **7.59** | **7.25** | **5.13** | **6.19** | **6.25** | **2.85** | **4.42** | **-0.10** |

Table S7 Longitudinal relaxation time (***T1*)** **for** [LaCoL3]6+, [TbCoL3]6+ and [TmCoL3]6+ at various magnetic fields in CD3CN (298 K).

Bidentate binding unit

| [LaCoL3]6+ | 200(MHz) | 300(MHz) | 400(MHz) | 500(MHz) | 600(MHz) |
| --- | --- | --- | --- | --- | --- |
| Me1 | 0.47 | 0.50 | 0.64 | 0.64 | 0.66 |
| Me2 | 0.39 | 0.45 | 0.55 | 0.52 | 0.60 |
| H1 | 0.71 | 0.95 | 1.06 | 1.00 | 1.10 |
| H2 | 0.60 | 0.93 | 0.96 | 0.73 | 0.90 |
| H3 | 0.39 | 0.64 | 0.63 | 0.50 | 0.65 |
| H4 | 0.44 | 0.64 | 0.72 | 0.67 | 0.77 |
| H5 | 0.40 | 0.54 | 0.64 | 0.65 | 0.72 |
| H6 | 0.90 | 1.41 | 1.41 | 1.17 | 1.43 |

Tridentate binding unit

| [LaCoL3]6+ | 200(MHz) | 300(MHz) | 400(MHz) | 500(MHz) | 600(MHz) |
| --- | --- | --- | --- | --- | --- |
| H9 | 1.24 | 1.52 | 1.85 | 1.95 | 2.08 |
| H10 | 0.42 | 0.58 | 0.65 | 0.64 | 0.72 |
| H11 | 0.44 | 0.63 | 0.72 | 0.68 | 0.77 |
| H12 | 0.44 | 0.61 | 0.70 | 0.65 | 0.78 |
| H13 | 0.56 | 0.78 | 0.87 | 0.79 | 0.88 |
| H14 | 0.42 | 0.50 | 0.67 | 0.67 | 0.74 |
| Me3 | 0.32 | 0.45 | 0.48 | 0.50 | 0.59 |
| Me4 | 0.39 | 0.46 | 0.53 | 0.58 | 0.61 |
| Me5 | 0.45 | 0.47 | 0.58 | 0.65 | 0.66 |

Bidentate binding unit

| [TbCoL3]6+ | 200(MHz) | 300(MHz) | 400(MHz) | 500(MHz) | 600(MHz) |
| --- | --- | --- | --- | --- | --- |
| Me1 | 0.31 | 0.35 | 0.37 | 0.39 | 0.39 |
| Me2 | 0.13 | 0.12 | 0.10 | 0.09 | 0.08 |
| H1 | 0.31 | 0.31 | 0.29 | 0.25 | 0.20 |
| H2 | 0.41 | 0.40 | 0.38 | 0.15 | 0.30 |
| H3 | 0.22 | 0.22 | 0.18 | 0.12 | 0.15 |
| H4 | 0.04 | 0.03 | 0.03 | 0.02 | 0.01 |
| H5 | 0.04 | 0.04 | 0.02 | 0.02 | 0.01 |
| H6 | 0.028 | 0.019 | 0.015 | 0.012 | 0.008 |

Tridentate binding unit

| [TbCoL3]6+ | 200(MHz) | 300(MHz) | 400(MHz) | 500(MHz) | 600(MHz) |
| --- | --- | --- | --- | --- | --- |
| H9 | *a* | *a* | *a* | *a* | *a* |
| H10 | *b* | *b* | *b* | *b* | *b* |
| H11 | 0.025 | 0.018 | 0.013 | 0.009 | 0.008 |
| H12 | 0.007 | 0.005 | 0.005 | 0.003 | 0.002 |
| H13 | 0.016 | 0.011 | 0.009 | 0.007 | 0.005 |
| H14 | 0.007 | 0.005 | 0.004 | 0.003 | 0.002 |
| Me3 | 0.015 | 0.010 | 0.009 | 0.007 | 0.004 |
| Me4 | 0.005 | 0.004 | 0.002 | 0.003 | 0.001 |
| Me5 | 0.006 | 0.003 | 0.004 | 0.009 | 0.003 |

Bidentate binding unit

| [TmCoL3]6+ | 200(MHz) | 300(MHz) | 400(MHz) | 500(MHz) | 600(MHz) |
| --- | --- | --- | --- | --- | --- |
| Me1 | 0.31 | 0.38 | 0.49 | 0.60 | 0.51 |
| Me2 | 0.21 | 0.20 | 0.20 | 0.20 | 0.16 |
| H1 | 0.49 | 0.48 | 0.48 | 0.47 | 0.37 |
| H2 | 0.12 | 0.27 | 0.45 | 0.13 | 0.43 |
| H3 | 0.28 | 0.28 | 0.32 | 0.32 | 0.25 |
| H4 | 0.15 | 0.12 | 0.10 | 0.09 | 0.06 |
| H5 | 0.079 | 0.06 | 0.046 | 0.018 | 0.029 |
| H6 | 0.081 | 0.06 | 0.04 | 0.03 | *b* |

Tridentate binding unit

| [TmCoL3]6+ | 200(MHz) | 300(MHz) | 400(MHz) | 500(MHz) | 600(MHz) |
| --- | --- | --- | --- | --- | --- |
| H9 | *a* | *a* | *a* | 0.0097 | *a* |
| H10 | 0.10 | 0.076 | 0.061 | 0.051 | 0.037 |
| H11 | 0.078 | 0.056 | 0.035 | 0.034 | 0.025 |
| H12 | 0.023 | 0.017 | *b* | 0.009 | *b* |
| H13 | 0.034 | 0.028 | *b* | 0.003 | *b* |
| H14 | 0.052 | 0.042 | *b* | 0.099 | 0.017 |
| Me3 | 0.046 | 0.033 | 0.021 | 0.021 | 0.017 |
| Me4 | 0.246 | 0.013 | *b* | 0.008 | *b* |
| Me5 | 0.066 | 0.047 | 0.035 | 0.030 | 0.0219 |

*a* Too short to obtain reliable relaxation times. *b* Overlap with other signals (methyl, solvent, etc...)

Table S8 Transversal relaxation rate (**)** **for** [TbCoL3]6+ at various magnetic fields in CD3CN (298 K).

|  | 200 MHz | 300 MHz | 400 MHz | 500 MHz | 600 MHz |
| --- | --- | --- | --- | --- | --- |
| H11 | 68 | 79 | 95 | 174 | 2176 |
| H12 | 186 | 303 | 503 | 6500 | 9235 |
| H13 | 149 | 173 | 251 | 309 | 385 |
| H14 | 223 | 347 | 503 | 650 | 769 |

Table S9 LnIII-Hi distances (*ri*, Å) and electronic relaxation times (*e*, ps) for (HHH)-[TbCoIIIL3]6+ (Ln = Tb, Tm) in CD3CN (298 K) obtained with eq. 11.

|  | H11 | H12 | H13 | H14 |
| --- | --- | --- | --- | --- |
| *ri* [TbCoIIIL3]6+ | 6.56 | 5.10 | 6.12 | 5.34 |
| *e* | 0.3 | 0.2 | 0.7 | 0.5 |
| *ri* [LaCoIIIL3]6+ *a* | 7.13 | 5.65 | 6.37 | 5.57 |
| *ri* [LuCoIIIL3]6+ *a* | 6.89 | 5.49 | 6.24 | 5.45 |

*a* Taken from the crystal structures of 6 and 7.

Table S10 Computed values for contact contributions ( in ppm) for protons Hn (n = 9,11-14) and axial anisotropic magnetic susceptibility parameters ( in ppm.Å3) for [LnCoL3]6+ in acetonitrile using eq. 9 and the crystal structure of 7 as structural model.29

|  | (H14) | (H13) | (H12) | (H11) | (H9) |  |  |
| --- | --- | --- | --- | --- | --- | --- | --- |
| Ce | -0.08(6) | 0.21(6) | 0.06(8) | 0.07(5) | 0.0(2) | 413(10) | 0.0024 |
| Pr | 0.09(8) | 0.30(8) | 0.5(1) | 0.38(7) | -0.1(2) | 666(13) | 0.0012 |
| Nd | 0.61(5) | 0.41(5) | 0.90(6) | 0.60(4) | 0.3(1) | 300(8) | 0.0032 |
| Eu | -1.33(5) | -0.67(6) | -1.92(7) | -1.22(5) | -0.7(1) | -342(9) | 0.0024 |
| Tb | -5.0(6) | -3.1(6) | -6.0(7) | -4.0(5) | -4.5(1.5) | 4518(92) | 0.0002 |
| Dy | -4.2(9) | -3(1) | -5(1) | -3.0(8) | -6(2) | 4941(150) | 0.0002 |
| Ho | -1.8(3) | -1.6(3) | -3.1(4) | -2.2(2) | -2.2(7) | 2660(44) | 0.0003 |
| Er | -1.9(1) | -1.7(1) | -2.5(1) | -1.4(1) | -0.9(7) | -562(18) | 0.0018 |
| Tm | -0.4(3) | -1.4(3) | -0.4(4) | -0.7(2) | 0.0(7) | -1614(44) | 0.0007 |
| Yb | 0.3(1) | 0.2(1) | 0.2(2) | -0.2(1) | 0.2(3) | -651(19) | 0.0019 |

Table S11 Computed values for contact contributions ( in ppm) for protons Hn (n = 9,11-14) and axial anisotropic magnetic susceptibility parameters ( in ppm.Å3) for (HHH)-[LnCoL3]6+ in acetonitrile using eq. 9 and the crystal structure of 6 as structural model.29

|  | (H14) | (H13) | (H12) | (H11) | (H9) |  |  |
| --- | --- | --- | --- | --- | --- | --- | --- |
| Ce | 0.2(1) | 0.5(1) | 0.3(1) | 0.24(9) | -1.8(2) | 379(15) | 0.0041 |
| Pr | 0.4(2) | 0.8(2) | 0.9(2) | 0.7(2) | -3.0(4) | 611(28) | 0.0027 |
| Nd | 0.80(9) | 0.63(9) | 1.1(1) | 0.73(8) | -1.1(2) | 275(13) | 0.0059 |
| Eu | -1.54(9) | -0.9(1) | -2.1(1) | -1.36(9) | 0.8(2) | -313(15) | 0.0043 |
| Tb | -2(1) | 0.0(1) | -3(2) | -2(1) | -24(2) | 4143(180) | 0.0004 |
| Dy | -1(2) | 0(2) | -2(2) | -1(2) | -28(3) | 4518(260) | 0.0005 |
| Ho | -0.2(6) | 0.3(6) | -1.5(8) | -1.1(6) | -14(2) | 2440(96) | 0.0006 |
| Er | -2.2(2) | -2.2(2) | -2.9(3) | -1.6(2) | 1.7(5) | -512(34) | 0.0038 |
| Tm | -1.4(6) | -2.6(6) | -1.4(8) | -1.3(6) | 7(1) | -1473(92) | 0.0016 |
| Yb | -0.1(2) | -0.3(3) | -0.2(3) | -0.5(2) | 3.1(5) | -594(38) | 0.0041 |
|  | -0.08 | -0.30 | -0.22 | -0.49 | 3.09 | -594.55 | 0.0041 |

Table S12 LnIII-Hi distances (*ri*, Å) and axial anisotropic magnetic susceptibility parameters ( in ppm.Å3) obtained for (HHH)-[LnCoL3]6+ in acetonitrile by non-linear least-squares fits of eq. 9.

|  | H1 | H2 | H3 | H4 | H5 | H6 | H9 | H10 | H11 | H12 | H13 | H14 |  | *AFjb* |
| --- | --- | --- | --- | --- | --- | --- | --- | --- | --- | --- | --- | --- | --- | --- |
| [LuCoL3]6+ *a* | 11.84 | 12.92 | 11.04 | 8.18 | 7.15 | 6.97 | 3.86 | 7.40 | 6.89 | 5.49 | 6.24 | 5.45 |  |  |
| Ce3+ | 11.61 | 13.17 | 11.11 | 8.27 | 7.06 | 6.82 | 3.83 | 6.71 | 7.33 | 5.62 | 6.15 | 5.78 | 390(10) | 3.08E-06 |
| Pr3+ | 11.68 | 13.16 | 11.17 | 8.17 | 6.91 | 6.89 | 3.87 | 6.85 | 6.77 | 5.69 | 6.44 | 5.83 | 646(18) | 2.35E-05 |
| Nd3+ | 11.48 | 13.24 | 11.08 | 8.23 | 6.92 | 6.91 | 4.19 | 6.69 | 6.34 | 5.95 | 7.13 | 5.65 | 296(5) | 8.51E-07 |
| Eu3+ | 11.59 | 12.11 | 10.69 | 7.80 | 6.61 | 6.53 | 4.66 | 6.44 | 7.91 | 6.83 | 8.53 | 6.05 | -283(16) | 7.27E-05 |
| Tb3+ | 11.26 | 12.39 | 10.57 | 7.68 | 6.74 | 6.53 | 3.42 | 6.51 | 7.50 | 5.65 | 6.41 | 6.02 | 4448(52) | 5.99E-08 |
| Dy3+ | 11.27 | 13.47 | 11.49 | 8.26 | 6.89 | 7.11 | 3.73 | 6.98 | 6.65 | 5.47 | 6.21 | 5.50 | 5126(85) | 5.89E-08 |
| Ho3+ | 11.56 | 12.77 | 10.90 | 8.12 | 6.89 | 6.75 | 4.50 | 6.80 | 7.45 | 6.48 | 7.22 | 6.27 | 2428(35) | 6.84E-07 |
| Er3+ | 12.71 | 13.27 | 11.72 | 8.09 | 6.70 | 7.21 | 2.96 | 7.35 | 6.33 | 4.22 | 4.78 | 4.08 | -614(92) | 1.25E-04 |
| Tm3+ | 11.90 | 13.03 | 11.16 | 7.82 | 6.56 | 6.92 | 3.90 | 7.54 | 9.88 | 5.71 | 6.25 | 5.30 | -1719(120) | 1.58E-04 |
| Yb3+ | 11.78 | 12.72 | 10.99 | 7.69 | 6.36 | 6.76 | 3.78 | 7.51 | 7.43 | 5.92 | 6.83 | 6.23 | -637(55) | 2.82E-05 |

*a* **Taken from the crystal structure of** 7**.** *b* **Wilcott agreement factor.**21

Table S13 *i* angles (degrees) obtained for (HHH)-[LnCoL3]6+ in acetonitrile by non-linear least-squares fits of eq. 9.

|  | H1 | H2 | H3 | H4 | H5 | H6 | H9 | H10 | H11 | H12 | H13 | H14 |
| --- | --- | --- | --- | --- | --- | --- | --- | --- | --- | --- | --- | --- |
| [LuCoL3]6+ *a* | 8.91 | 23.47 | 26.33 | 42.07 | 47.87 | 20.05 | 37.76 | 47.70 | 56.74 | 84.65 | 100.96 | 114.66 |
| Ce3+ | 8.90 | 23.50 | 26.34 | 42.09 | 47.84 | 20.04 | 37.75 | 47.46 | 56.19 | 84.64 | 100.96 | 114.71 |
| Pr3+ | 8.90 | 23.49 | 26.35 | 42.07 | 47.79 | 20.04 | 37.76 | 47.51 | 56.87 | 84.64 | 100.97 | 114.71 |
| Nd3+ | 8.90 | 23.50 | 26.34 | 42.08 | 47.79 | 20.04 | 37.78 | 47.45 | 57.30 | 84.64 | 101.00 | 114.69 |
| Eu3+ | 8.90 | 23.38 | 26.30 | 41.98 | 47.68 | 20.02 | 37.80 | 47.37 | 55.33 | 84.62 | 101.07 | 114.75 |
| Tb3+ | 8.89 | 23.41 | 26.28 | 41.94 | 47.70 | 20.02 | 38.18 | 47.25 | 50.66 | 84.63 | 100.98 | 114.91 |
| Dy3+ | 8.89 | 23.53 | 26.38 | 42.08 | 47.78 | 20.05 | 37.75 | 47.54 | 57.00 | 84.65 | 100.96 | 114.67 |
| Ho3+ | 8.90 | 23.45 | 26.32 | 42.04 | 47.77 | 20.00 | 37.47 | 47.48 | 55.98 | 84.59 | 101.03 | 114.84 |
| Er3+ | 8.94 | 23.51 | 26.41 | 42.05 | 47.71 | 20.09 | 37.88 | 47.68 | 57.30 | 84.68 | 100.88 | 114.42 |
| Tm3+ | 8.91 | 23.48 | 26.34 | 41.93 | 47.47 | 20.04 | 37.75 | 47.71 | 41.06 | 84.65 | 100.94 | 114.62 |
| Yb3+ | 8.91 | 23.45 | 26.33 | 41.96 | 47.60 | 20.04 | 37.75 | 47.74 | 56.06 | 84.64 | 100.99 | 114.78 |

*a* **Taken from the crystal structure of** 7**.**

*Table S14. Comparison of theoretical26 and experimental values of the axial magnetic anisotropic susceptibility (Cj) for (HHH)-[LnCoL3]6+ obtained by linear (Table 7)a and non-linear least-squares fits (Table S12).b*

|  | /ppm.Å**3  linear** | /ppm.Å3 non-linear | Scaled *Cj* non-linear | Theory26 |
| --- | --- | --- | --- | --- |
| Ce | 413(10) | 390(10) | -4.76 | -6.30 |
| Pr | 666(13) | 646(18) | -7.88 | -11.00 |
| Nd | 300(8) | 296(5) | -3.61 | -4.20 |
| Eu | -342(9) | -283(16) | 3.45 | 4.00 |
| Tb | 4518(92) | 4448(52) | -86.78 | -86.00 |
| Dy | 4941(150) | 5126(85) | -100.00 | -100.00 |
| Ho | 2660(44) | 2428(35) | -47.37 | -39.00 |
| Er | -562(18) | -614(92) | 11.99 | 33.00 |
| Tm | -1614(44) | -1719(120) | 33.54 | 53.00 |
| Yb | -651(19) | -637(55) | 12.44 | 22.00 |

**a Ratios relative to NdIII(*Cj* = -100) are given** **(see text)**. ***b* The molecular structure of (HHH)-[LuCoL3]6+ in** 7 **is taken as model.**

Table S15 Geometric ratio and intercepts obtained from plots of vs according to eq 6 for [LnCoqL3](3+q)+ (q = 2,3, CD3CN, 298 K).*a*

|  | **H1-H2** | **H1-H3** | **H1-H4** | **H1-H5** | **H1-H6** | **H1-H9** | **H1-H10** | **H1-H11** | **H1-H12** | **H1-H13** | **H1-H14** | **Ref.** |
| --- | --- | --- | --- | --- | --- | --- | --- | --- | --- | --- | --- | --- |
| ***Rikb*** | **1.83(6)** | **1.22(3)** | **1.00(5)** | **1.10(8)** | **0.244(7)** | **0.076(2)** | **1.07(6)** | **-4.6(7)** | **-0.22(1)** | **-0.33(2)** | **-0.48(2)** | **19** |
| ***Rik* *c*** | **1.6(2)** | **0.2(1)** | **0.7(1)** | **0.6(3)** | **0.07(4)** | **0.04(2)** | **0.4(2)** | **-2(2)** | **-0.13(3)** | **-0.18(4)** | **-0.27(9)** | **this work** |
| ***b*** | **0.01(1)** | **0.01(1)** | **0.01(1)** | **0.01(2)** | **0.011(7)** | **0.004(7)** | **0.00(2)** | **0.5(1)** | **0.044(7)** | **0.04(1)** | **0.06(1)** | **19** |
| ***c*** | **0.03(2)** | **-0.04(6)** | **-0.02(3)** | **0.04/6)** | **0.03(7)** | **0.04(5)** | **0.03(6)** | **0.2(2)** | **0.08(5)** | **0.09(4)** | **0.08(6)** | **this work** |
|  |  |  |  |  |  |  |  |  |  |  |  |  |
|  | **H2-H3** | **H2-H4** | **H2-H5** | **H2-H6** | **H2-H9** | **H2-H10** | **H2-H11** | **H2-H12** | **H2-H13** | **H2-H14** | **H3-H4** |  |
| ***Rikb*** | **0.665(9)** | **0.55(1)** | **0.60(3)** | **0.133(2)** | **0.0413(4)** | **0.58(5)** | **-2.5(4)** | **-0.120(5)** | **-0.18(1)** | **-0.26(1)** | **0.82(3)** | **19** |
| ***Rik* *c*** | **0.106(8)** | **0.4(1)** | **0.5(1)** | **0.06(2)** | **0.033(6)** | **0.4(1)** | **-1(2)** | **-0.09(1)** | **-012(1)** | **-0.20(4)** | **1.8(4)** | **this work** |
| ***b*** | **0.000(2)** | **0.000(4)** | **0.002(7)** | **0.000(2)** | **-0.004(1)** | **-0.01(1)** | **0.27(6)** | **0.018(6)** | **0.014(9)** | **0.026(8)** | **0.001(8)** | **19** |
| ***c*** | **-0.04(4)** | **-0.03(3)** | **0.01(3)** | **0.00(3)** | **0.00(2)** | **0.00(3)** | **0.0(1)** | **0.04(2)** | **0.04(2)** | **0.04(2)** | **0.1(1)** | **this work** |
|  |  |  |  |  |  |  |  |  |  |  |  |  |
|  | **H3-H5** | **H3-H6** | **H3-H9** | **H3-H10** | **H3-H11** | **H3-H12** | **H3-H13** | **H3-H14** | **H4-H5** | **H4-H6** | **H4-H9** |  |
| ***Rikb*** | **0.91(6)** | **0.200(1)** | **0.062 (0)** | **0.88(6)** | **-3.725** | **-0.180(5)** | **-0.27(1)** | **-0.39(2)** | **1.11(3)** | **0.24(1)** | **0.075(3)** | **19** |
| ***Rik* *c*** | **-0.7(9)** | **-0.2(1)** | **-0.03(6)** | **-0.9(7)** | **-15(3)** | **0.0(29** | **0.0(2)** | **0.2(3)** | **0.3(4)** | **0.01(6)** | **0.03(2)** | **this work** |
| ***b*** | **0.00(1)** | **0.000(1)** | **-0.006(1)** | **-0.01(1)** | **0.4049** | **0.027(6)** | **0.02(1)** | **0.04(1)** | **0.004(7)** | **0.00(1)** | **-0.009(9)** | **19** |
| ***c*** | **0.1(2)** | **0.0(2)** | **0.1(2)** | **0.0(2)** | **1.6(3)** | **0.1(2)** | **0.1(2)** | **0.1(2)** | **0.03(9)** | **0.00(9)** | **0.02(8)** | **this work** |
|  |  |  |  |  |  |  |  |  |  |  |  |  |

**Table S15 (continued)**

|  | **H4-H10** | **H4-H11** | **H4-H12** | **H4-H13** | **H4-H14** | **H5-H6** | **H5-H9** | **H5-H10** | **H5-H11** | **H5-H12** | **H5-H13** |  |
| --- | --- | --- | --- | --- | --- | --- | --- | --- | --- | --- | --- | --- |
| ***Rikb*** | **1.0(1)** | **-4(1)** | **-0.22(1)** | **-0.32(3)** | **-0.47(3)** | **0.21(1)** | **0.067(4)** | **0.9(1)** | **-4.0(8)** | **-0.19(2)** | **-0.28(3)** | **19** |
| ***Rik* *c*** | **0.1(3)** | **-6(2)** | **-0.09(6)** | **-0.14(8)** | **-0.2(1)** | **0.14(1)** | **0.062(2)** | **0.82(5)** | **2(3)** | **-0.16(1)** | **-0.21(2)** | **this work** |
| ***b*** | **-0.02(3)** | **-0.5(1)** | **0.03(2)** | **0.02(2)** | **0.04(2)** | **-0.01(1)** | **-0.01(1)** | **-0.02(3)** | **0.4(1)** | **0.02(2)** | **0.01(5)** | **19** |
| ***c*** | **0.01(9)** | **0.5(2)** | **0.07(8)** | **0.08(8)** | **0.06(9)** | **0.00(2)** | **-0.010(6)** | **0.00(1)** | **-0.3(2)** | **0.03(2)** | **0.03(3)** | **this work** |
|  |  |  |  |  |  |  |  |  |  |  |  |  |
|  | **H5-H14** | **H6-H9** | **H6-H10** | **H6-H11** | **H6-H12** | **H6-H13** | **H6-H14** | **H9-H10** | **H9-H11** | **H9-H12** | **H9-H13** |  |
| ***Rikb*** | **-0.42(4)** | **0.311(3)** | **4.4(3)** | **-19(3)** | **-0.90(2)** | **-1.34(6)** | **-1.96(9)** | **14(1)** | **-60(10)** | **-2.90(9)** | **-4.3(2)** | **19** |
| ***Rik* *c*** | **-0.36(3)** | **0.43(5)** | **6.0(2)** | **22(16)** | **-1.1(2)** | **-1.4(3)** | **-2.5(3)** | **13(1)** | **24(39)** | **-2.6(1)** | **-3.4(3)** | **this work** |
| ***b*** | **0.03(2)** | **-0.03(1)** | **-0.07(7)** | **2.0(5)** | **0.13(3)** | **0.11(6)** | **0.20(5)** | **-0.1(2)** | **7(1)** | **0.5(1)** | **0.4(2)** | **19** |
| ***c*** | **0.05(2)** | **-0.1(2)** | **0.00(4)** | **-3(2)** | **0.1(3)** | **0.1(3)** | **0.3(2)** | **0.1(3)** | **-4(4)** | **0.7(2)** | **0.7(3)** | **this work** |
|  |  |  |  |  |  |  |  |  |  |  |  |  |
|  | **H9-H14** | **H10-H11** | **H10-H12** | **H10-H13** | **H10-H14** | **H11-H12** | **H11-H13** | **H11-H14** | **H12-H13** | **H12-H14** | **H13-H14** |  |
| ***Rikb*** | **-6.3(3)** | **-4.2(7)** | **-0.202(9)** | **-0.30(2)** | **-0.44(2)** | **0.042(7)** | **0.06(1)** | **0.09(1)** | **1.48(5)** | **2.17(6)** | **1.45(6)** | **19** |
| ***Rik* *c*** | **-5.9(4)** | **3(3)** | **-0.18(3)** | **-0.24(4)** | **-0.43(5)** | **-0.03(8)** | **0.00(1)** | **0.01(2)** | **1.33(6)** | **2.2(1)** | **1.6(1)** | **this work** |
| ***b*** | **0.7(4)** | **0.48(9)** | **0.04(1)** | **0.04(1)** | **0.06(1)** | **0.106(8)** | **0.11(1)** | **0.103(8)** | **0.03(4)** | **-0.07(7)** | **-0.06(3)** | **19** |
| ***c*** | **0.9(2)** | **-0.4(3)** | **0.03(4)** | **0.03(4)** | **0.05(3)** | **0.10(1)** | **0.10(1)** | **0.10(1)** | **-0.01(7)** | **-0.09(9)** | **-0.04(9)** | **this work** |

*a* Values for all possible pairs are reported because are non linear functions. For *Rik*, a much smaller minimal set of data is necessary.19
*b* Values for the isostructural series HHH-[LnCoIIIL3]6+ (Ln = Ce-Yb, Sm has been removed because of its faint paramagnetism).19 *c* Values for the isostructural series HHH-[LnCoIIL3]5+ obtained in the same conditions.

Figure S1 Projection of the structure of 7 along the b direction showing the pseudo-hexagonal arrangement of the triple helices.

Figure S2 Plot of vs for H12 in (HHH)-[TbCoIIIL3]6+ (acetonitrile, 298 K).

Figure S3 Plot of vs for H12 in (HHH)-[TbCoIIIL3]6+ (acetonitrile, 298 K).

Figure S4 Plot of vs according to eq 6 for H12-H13 in (HHH)-[LnCoL3]5+ (acetonitrile, 298 K).
